# Supplementary material for: Measuring the Refractive Index of Highly Crystalline Monolayer MoS2 with High Confidence
Source: PubMed Central journal article supplement (PMC4326697; doi:10.1038/srep08440), 2015-02-13
Supplement: srep08440-s1.pdf [file srep08440-s1.pdf]

## Supplementary Information

# Measuring the Refractive Index of Highly Crystalline Monolayer MoS<sub>2</sub> with High Confidence

*Hui Zhang,<sup>1,2</sup> Yaoguang Ma,<sup>1</sup> Yi Wan,<sup>1</sup> Xin Rong,<sup>1</sup> Ziang Xie,<sup>1</sup> Wei Wang,<sup>1</sup> and Lun Dai,<sup>1,2, a)</sup>*

<sup>1</sup> State Key Lab for Mesoscopic Physics and School of Physics, Peking University, Beijing 100871, China

<sup>2</sup> Collaborative Innovation Center of Quantum Matter, Beijing 100871, China

a) To whom correspondence should be addressed. E-mail: [lundai@pku.edu.cn](mailto:lundai@pku.edu.cn)

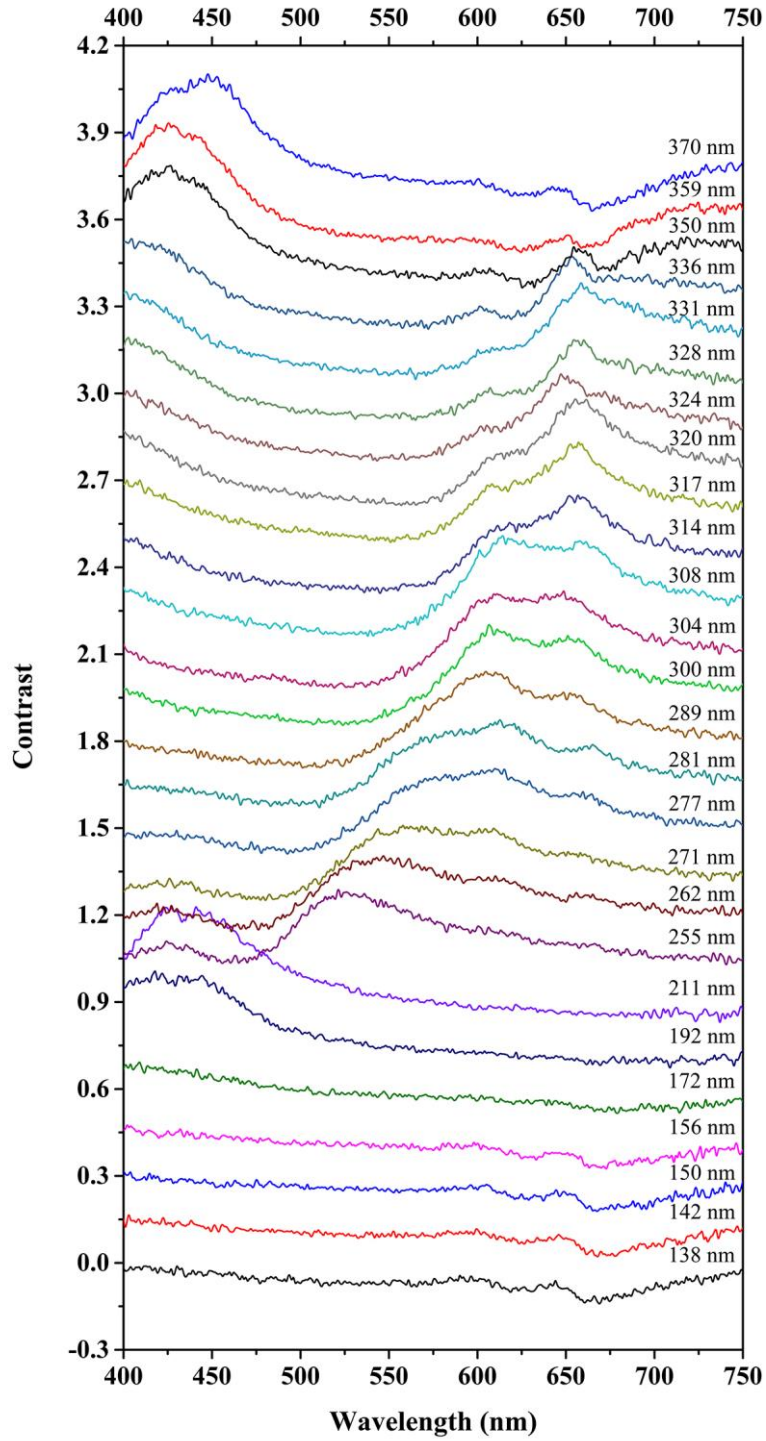

**Supplementary Figure S1:** The optical contrast spectra of 26 monolayer MoS<sub>2</sub> samples on various SiO<sub>2</sub>/Si substrates with SiO<sub>2</sub> thickness changing from ~ 130 nm to ~ 370 nm. We add 0.15 to each curve in sequence to stagger them.

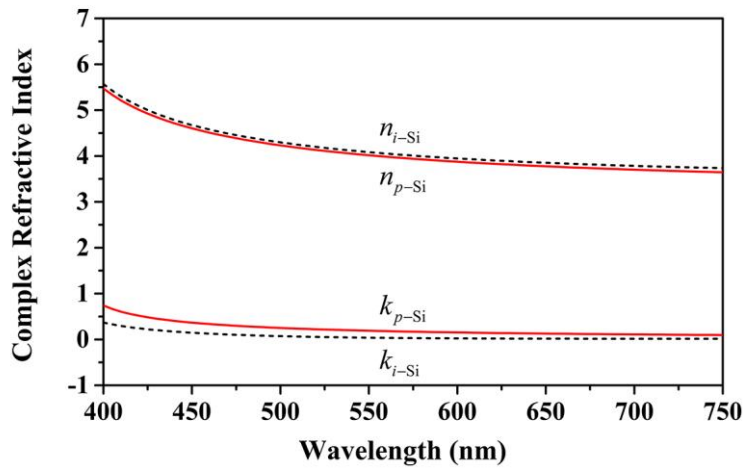

**Supplementary Figure S2:** The refractive index of the  $p$ -Si (resistivity: 8-12  $\Omega$ -cm) substrate (red solid lines) measured by the ellipsometer (Horiba Jobin Yvon Uvisel). The refractive index of intrinsic silicon<sup>1</sup> (black dashed lines) is also plotted in this figure for comparison.

#### Confidence Interval and Confidence Level:

Confidence level reflects the probability that the true value locates in the confidence interval<sup>2</sup>. 95% is a typical high confidence level in statistics. In our case, it means that the true value of the refractive index locates in the confidence interval with 95% probability.

The confidence interval is extracted from the estimate value of parameter, the standard error, and the t-value. The t-value is a statistic factor of Student's t-distribution<sup>3, 4</sup>, which is determined by the confidence level and the number of samples.

#### Supplementary Reference:

1. Palik, E. D. *Handbook of optical constants of solids*. Academic Press (1985).
2. Cox, D. R., Hinkley, D.V. *Theoretical Statistics*. Chapman and Hall (1974)
3. Gosset, W. S. The probable error of a mean. *Biometrika* **6**, 1-25 (1908)
4. Hogg, R. V., Craig, A. T. *Introduction to Mathematical Statistics*. Macmillan (1978)
